# Supplementary material
Source: publisher figshare collection journal article supplement (https://acs.figshare.com/ndownloader/files/4427965)
Supplement: Supplementary file 1 [file 4427965]

## **SUPPORTING INFORMATION**

### **Identification of Organic Nitrates in the NO<sub>3</sub> Radical Initiated Oxidation of $\alpha$ -Pinene by Atmospheric Pressure Chemical Ionization Mass Spectrometry**

Véronique Perraud, Emily A. Bruns, Michael J. Ezell, Stanley N. Johnson, John Greaves, and

Barbara J. Finlayson-Pitts\*

Department of Chemistry, University of California Irvine, Irvine, CA 92697-2025

July 01, 2010

\*Author to whom correspondence should be addressed: phone (949) 824-7670; fax (949) 824-2420; e-mail [bjfinlay@uci.edu](mailto:bjfinlay@uci.edu)

#### **Summary**

Number of pages: 20

2 Figures

3 Tables

3 Schemes

### **Additional Experimental Details.**

***Atmospheric pressure chemical ionization triple quadrupole mass spectrometry:*** In APCI-MS, positive ion formation occurs via a corona discharge that generates protonated water clusters from trace water present in the system. For analytes with higher proton affinities (PA) than the water clusters, transfer of a proton forms an  $[M + H]^+$  ion which generally can be detected and measured, although some fragmentation of this parent ion can occur. The APCI-MS instrument was operated in two different modes in addition to the Q1 single quadrupole scan. In the product ion scan mode (designated MS/MS throughout), ions of chosen  $m/z$  exit the first quadrupole (Q1) and are collisionally dissociated using nitrogen gas. The resulting fragment ions are scanned in the last quadrupole (Q3), producing a mass spectrum that shows characteristic fragmentation patterns for the ion selected in Q1; this is useful for elucidating the structure of the chosen ion. In the precursor ion scan mode (PIS), Q3 is fixed at a particular  $m/z$  and Q1 is scanned to determine precursors to the Q3 selected ion. Thus, the PIS mode is useful for establishing whether a given ion observed in the Q1 scan is a parent  $[M + H]^+$  ion or a fragment from a larger ion.

***Reagents:*** The nitrate radical was generated via the thermal decomposition of  $N_2O_5$ :

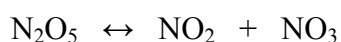

$N_2O_5$  was prepared in a glass vacuum rack by reacting a 2.4%  $O_3/O_2$  mixture from a discharge ozone generator with  $NO_2$ , and was stored in a dry ice-acetone bath ( $-78\text{ }^\circ\text{C}$ ) until needed (no longer than six days to minimize surface loss of the  $N_2O_5$  by its conversion to nitric acid). The cold trap containing the  $N_2O_5$  was warmed to vaporize a portion of the sample into a calibrated, previously evacuated and conditioned, 0.410 L bulb until the desired pressure was reached. Nitrogen was then added to give a total pressure of 1 atm.

Before each experiment,  $\alpha$ -pinene [(1R)-(+)- $\alpha$ -pinene, Sigma Aldrich, > 99%] was purified by passage through a glass column of neutral aluminium oxide (chromatography grade, J.T. Baker Chemical Company) to remove oxidized impurities. After this treatment, GC-MS analysis showed only a  $\beta$ -pinene impurity (1.6%). The standard, *cis*-pinonic acid (Aldrich, 98%), was used as received.

***Gas-phase measurement of  $\alpha$ -pinene:*** Measurements of  $\alpha$ -pinene in the reaction chamber were made by collecting a gas sample in a 1 mL stainless steel loop followed by analysis by GC-MS (Agilent 7890A GC and a 5975C inert XL EI/CI MSD with triple-axis detector) with a Supelco SLB<sup>TM</sup>-5ms column of 20 m length, 0.18 mm internal diameter, and a 0.18  $\mu$ m film thickness using single ion monitoring on  $m/z$  91. The use of a NIST traceable standard of 560 ppb  $\alpha$ -pinene diluted in nitrogen (Scott-Marin) was used for calibration. Helium (Ultra High Purity, Oxygen Services Company) was used as the carrier gas. The oven temperature gradient started at 0 °C obtained by cooling using vapor from a liquid nitrogen tank (hold 1 min) and increased at 40 °C min<sup>-1</sup> to 240 °C. The experimentally determined limit of detection for  $\alpha$ -pinene was 1 ppb.

***Denuder efficiency experiments:*** Independent tests were carried out to measure the efficiency of the carbon denuder for removal of gases as well as the transmission efficiency for particles. Prior to all measurements, the denuders were reconditioned overnight under a stream of nitrogen (Ultra High Purity, Oxygen Services Company) at ~ 75 °C. The denuder removed more than 99% of the gases in experiments using 200 ppb  $\alpha$ -pinene and 200 ppb acetone (HPLC grade, EMD Chemicals). Given the large signals from the gas phase compared to the particles (Figure 1 in text), a small contribution from the gas phase to the MS assigned to particles in Figure 1b cannot be ruled out with certainty. Transmission of particles

formed during the ozonolysis of  $\alpha$ -pinene through the denuder was experimentally measured to be greater than 92% at a flow of  $1.0 \text{ L min}^{-1}$  and there was no change in the particle size distribution as measured by particle size spectrometers described below. The removal of  $\text{N}_2\text{O}_5/\text{NO}_3$  was also tested by sampling a mixture formed by reacting 1 ppm  $\text{O}_3$  with 4 ppm  $\text{NO}_2$  in an aerosol flow tube (SI) into a long path-length (64 m) FTIR apparatus either directly or after passing through the denuder. No  $\text{N}_2\text{O}_5$  could be detected after passing through the denuder, indicating greater than 95% removal.

***Size distribution of particles:*** The size distribution of the particles was measured using a scanning mobility particle sizer (SMPS) consisting of a long differential mobility analyzer (DMA, TSI Model 3080) and a condensation particle counter (CPC, TSI Model 3022A), and an aerodynamic particle sizer (APS, TSI Model 3321).

***Filter sampling of particles:*** Particles generated in a 300 L Teflon<sup>®</sup> chamber experiment using 2 ppm of  $\alpha$ -pinene and 1 ppm of  $\text{N}_2\text{O}_5$  were collected, after passage through the denuder, on quartz-fiber filters (Tissuquartz<sup>™</sup>, 37 mm diameter) mounted in a 3-piece polypropylene SureSeal air monitoring cassette (SKC). Prior to use, the filters were baked in air at  $\sim 475^\circ\text{C}$  overnight to remove organic contaminants. A total air sample volume of  $\sim 270\text{-}290 \text{ L}$  was passed through the filters.

***Filter analysis:*** After sampling, filters were extracted using 2 mL of acetonitrile (HPLC grade, EMD Chemicals) with sonication for 10 minutes. The extracts were analyzed using electrospray ionization mass spectrometry [ESI-ToF-MS (negative ion detection)] and GC/MS. ESI-ToF-MS was conducted using a LCT Premier mass spectrometer (Waters) operating in the negative ionization mode (mass range: 100 to 2000 Da). Samples were

introduced via a 6-port injection valve directly into the solvent stream using flow injection analysis (FIA). The sample injection volume was 10  $\mu\text{L}$  and the mobile phase was methanol (Optima<sup>®</sup> LC-MS grade, Fischer Scientific) with a flow rate of 0.1  $\text{mL min}^{-1}$ . The temperature of the source was 150  $^{\circ}\text{C}$ . A 500  $\text{L hr}^{-1}$  flow of nitrogen maintained at 150  $^{\circ}\text{C}$  was used as the desolvation gas. Electrospray and sample cone voltages were 3000 V and 30 V respectively. Data were acquired using MassLynx<sup>™</sup> Software (Waters).

GC-MS analysis was conducted on an Agilent Model 6850 Series II GC coupled to a Model 5975B VL mass selective detector (MSD). Separation was performed on a DB-5ms column of 60-m length, 0.25-mm internal diameter, and 0.25- $\mu\text{m}$  film thickness (Agilent). A portion of the quartz-fiber filter extracts (200  $\mu\text{L}$ ) was evaporated into dryness under a gentle stream of nitrogen, redissolved in 20  $\mu\text{L}$  of dichloromethane (OmniSolv, EMD chemicals), and 3  $\mu\text{L}$  of the redissolved extract was then injected onto the GC-MS (splitless mode). The column was temperature programmed as follows: 60  $^{\circ}\text{C}$  (hold 5 min) followed by a temperature ramp at 3  $^{\circ}\text{C min}^{-1}$  to reach 240  $^{\circ}\text{C}$  (hold for 5 min). The inlet temperature was 160  $^{\circ}\text{C}$  and the carrier gas was helium (Ultra High Purity, Oxygen Services Company) with a flow rate of 1.0  $\text{mL min}^{-1}$ . Temperatures of the transfer line, source and quadrupole were 275  $^{\circ}\text{C}$ , 230  $^{\circ}\text{C}$  and 150  $^{\circ}\text{C}$  respectively. Electron ionization (70 eV) and scanning  $m/z$  from 35 to 550 allowed the identification of compounds by comparison of their mass spectra with the NIST library (identification match > 90%) or with spectra obtained from authentic standards.

Prior to analysis, carboxylic acids and alcohols from the quartz fiber filter extracts were derivatized using N,O-bis(trimethylsilyl)trifluoroacetamide (BSTFA) reagent with trimethylchlorosilane catalyst (Supelco, BSTFA + TMC, 99:1) in pyridine (99% GR ACS, EMD Chemicals) (S2). The inlet temperature was heated to 280  $^{\circ}\text{C}$  and the trimethylsilyl

derivatives were separated using a different column temperature program: starting at 84 °C (hold 1 min), increasing at 10 °C min<sup>-1</sup> to 200 °C (hold 6 min), followed by a second ramp at 10 °C min<sup>-1</sup> to 280 °C. The final temperature was held for 15 min.

***Accurate mass measurement:*** Atmospheric pressure chemical ionization time-of-flight mass spectrometry (APCI-ToF-MS) was conducted on a LCT Premier mass spectrometer (Waters) using the positive ionization mode (mass range: 100 to 300 Da). Samples were introduced via a 6-port injection valve directly into the solvent stream for FIA. The sample injection volume was 10 µL and the mobile phase was methanol (Optima<sup>®</sup> LC-MS grade, Fischer Scientific) with a flow rate of 0.1 mL min<sup>-1</sup>. The APCI probe and the source were maintained at 500 °C and 100 °C respectively. The corona discharge current was 5 µA and the sample cone voltage was 30 V. Addition of a small amount of a dilute caffeine solution (194.1908 Da) provided the reference lock mass for exact mass measurement to obtain empirical formulae. The analyzer was operated in W mode at a resolution > 8000 FWHM. Data were acquired using MassLynx<sup>™</sup> Software (Waters).

### **Mechanisms of Formation of Products.**

Scheme S1 summarizes a simplified mechanism for the formation of the four major products (S3-8). Minor products include  $\alpha$ -campholene aldehyde, norpinonaldehyde, and  $\alpha$ -pinene oxide (S3, S5-8). Our experiments were carried out in absence of NO, and the self- and cross reaction of the peroxy radicals is expected to govern the formation of alkoxy radicals, leading to the formation of pinonaldehyde and the hydroxy- and keto-pinane nitrate products. Formation of pinonaldehyde-PAN has been reported to be the major product from the further reaction of pinonaldehyde with NO<sub>3</sub> radicals (S7, S9).

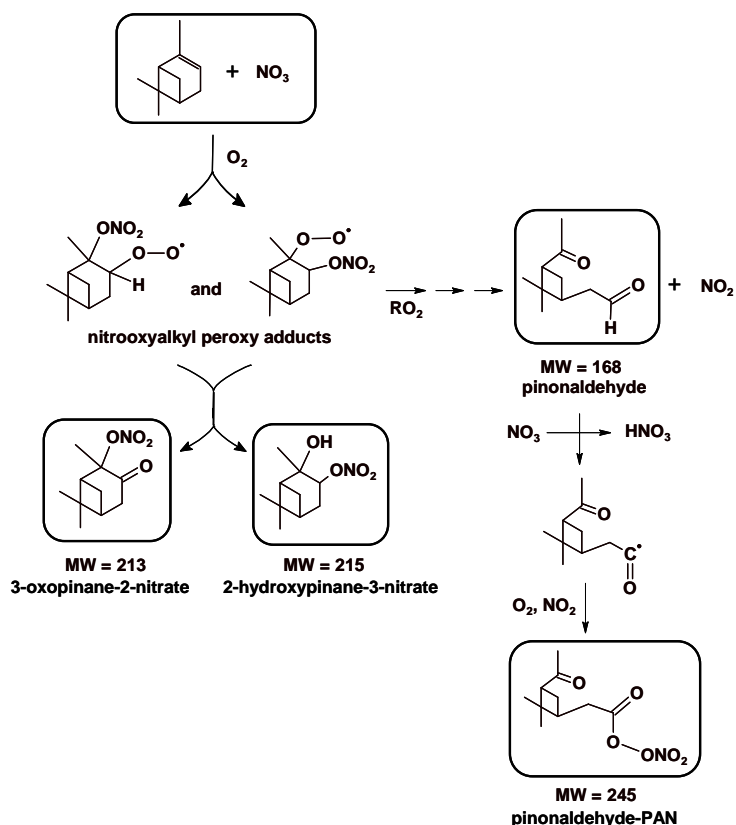

**Scheme S1.** Partial mechanism for the  $NO_3$  radical oxidation of  $\alpha$ -pinene to form the major reaction products (see references (S3, S6, S7)).

Possible pathways leading to the formation of carbonyl hydroxynitrate products with molecular mass 229 are presented in Scheme S2. Following a similar mechanism to that reported for OH chemistry (S10-13), we propose isomerization of the nitrooxyalkoxy radical formed from the addition of  $NO_3$  to the double bond of  $\alpha$ -pinene via a six-membered transition state. The result is a multifunctional organic nitrate that contains both a carbonyl and an alcohol group. Loss of  $H_2O$  is expected in the APCI-MS, leading to the formation of a  $[M + H - H_2O]^+$  fragment ion at  $m/z$  212, and this fragment was observed in the Q1 scan of a  $N_2O_5/\alpha$ -pinene chamber experiment presented in Figure 1 in the text.

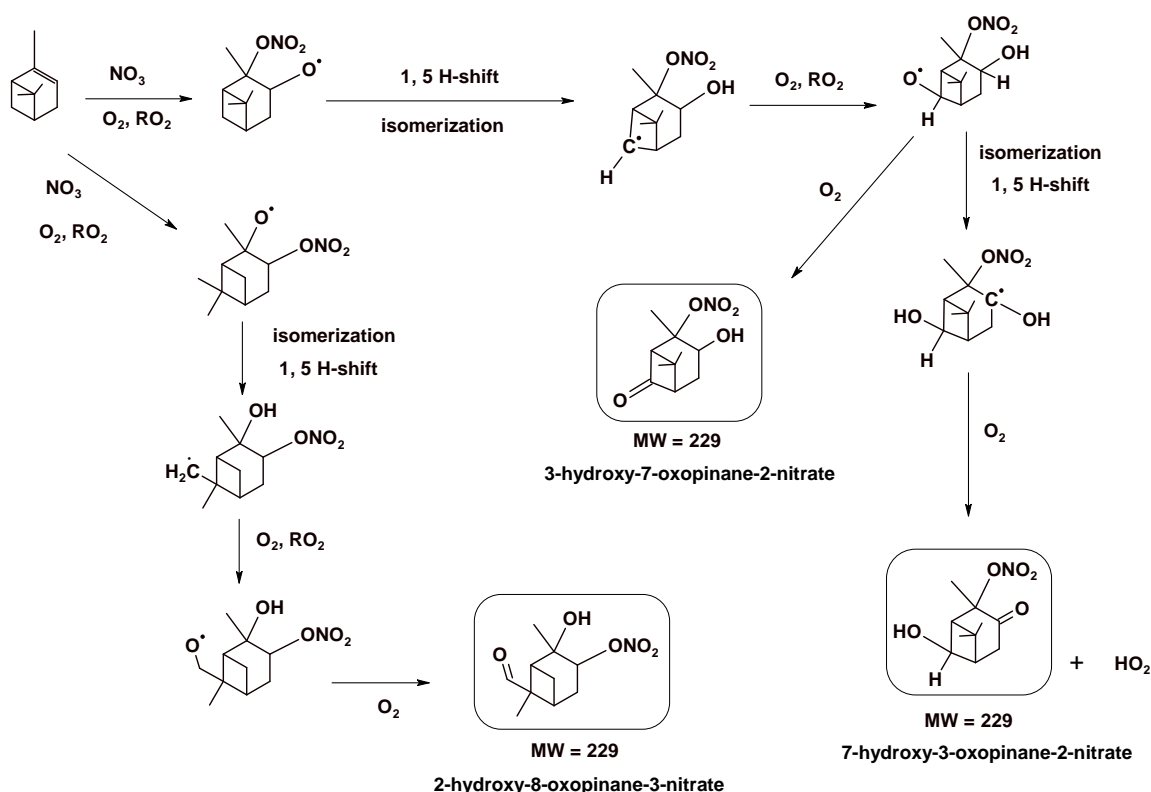

**Scheme S2.** Potential mechanism for the formation of carbonyl hydroxynitrates responsible for the  $m/z$  212 observed in the Q1 scan (Figure 1 in text).

Scheme S3 presents a simplified mechanism for the reaction of pinonaldehyde, a first generation product, with  $\text{NO}_3$ . Pinonaldehyde reacts with  $\text{NO}_3$  with a rate constant  $k^{298\text{K}} = 2.0 \times 10^{-14} \text{ molecules cm}^{-3}$  (S14-17). While the reaction of pinonaldehyde with  $\text{NO}_3$  is  $\sim 300$  times slower than the  $\alpha$ -pinene/ $\text{NO}_3$  reaction ( $k^{298\text{K}} = 6.2 \times 10^{-12} \text{ molecules cm}^{-3}$  (S17)), pinonaldehyde continues to react after all the  $\alpha$ -pinene has been consumed. Pinonaldehyde-PAN has been reported to be the major reaction product (S7, 9). Norpinonaldehyde has been reported as a decomposition product of pinonaldehyde in the OH reaction (S18, 19), and a minor product in the  $\alpha$ -pinene/ $\text{NO}_3$  system (S5). The reactivity of norpinonaldehyde towards  $\text{NO}_3$  is expected to be similar to that for pinonaldehyde, leading to norpinonaldehyde-PAN. As shown in this study and as reported by Noziere and Barnes (S9), abstraction of the tertiary hydrogen by  $\text{NO}_3$  constitutes one pathway for the degradation of pinonaldehyde and the formation of (3-acetyl-2,2-dimethyl-3-nitrooxycyclobutyl)acetaldehyde (MW 229). The latter



is expected to be a minor product since the contribution of the tertiary hydrogen abstraction is small and the alkoxy radical precursor can also decompose and undergo isomerization via internal hydrogen shifts (S20). A large increase in the MS signals assigned to pinonaldehyde-PAN, norpinonaldehyde-PAN, and (3-acetyl-2,2-dimethyl-3-nitrooxycyclobutyl)acetaldehyde (MW 229) and decrease in pinonaldehyde as a function of reaction time is consistent with these products being secondary products formed from pinonaldehyde secondary chemistry.

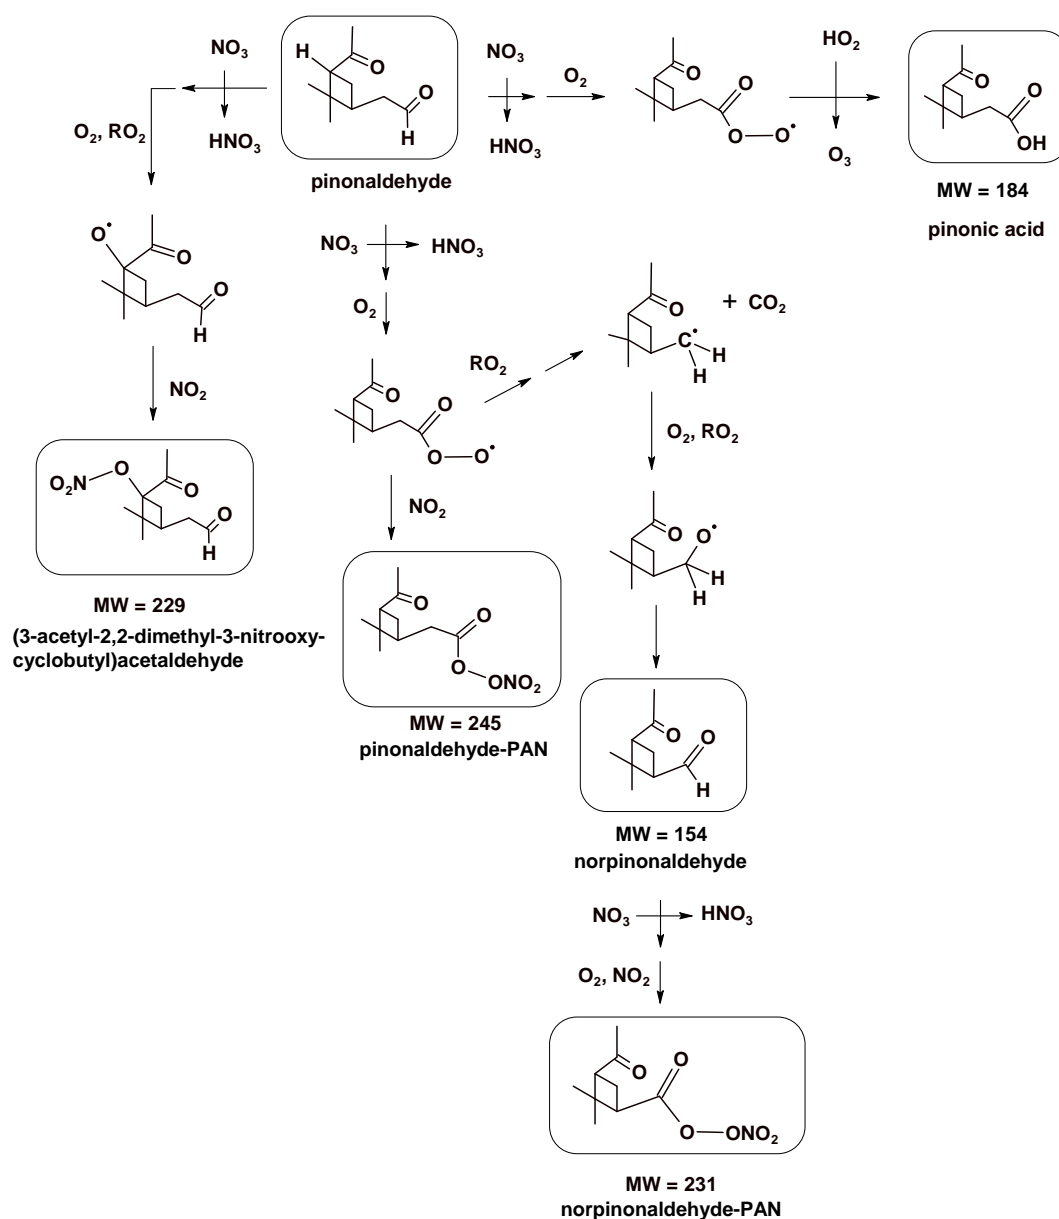

**Scheme S3.** Partial mechanism for the oxidation of pinonaldehyde by  $\text{NO}_3$  to give the five observed products shown.

The relative amounts of the products formed from this chemistry in the atmosphere will be somewhat different than measured in the present studies where relatively high concentrations of NO<sub>2</sub> are present from the N<sub>2</sub>O<sub>5</sub> decomposition, but NO concentrations are small. For example, the formation of the PAN products is emphasized at higher NO<sub>2</sub> concentrations.

### **Pinonic Acid Analysis.**

Figure S1 shows MS/MS scans of the  $[M + H]^+$  ion at  $m/z$  185 from a N<sub>2</sub>O<sub>5</sub>/α-pinene experiment (4 ppm N<sub>2</sub>O<sub>5</sub>, 1.4 ppm α-pinene, 110 min reaction time) and from a commercial sample of *cis*-pinonic acid. The two scans show an identical fragmentation pattern, including a loss of water from the  $[M + H]^+$  peak leading to an intense fragment at  $m/z$  167, as well as a number of smaller fragments corresponding to loss of H<sub>2</sub>O, CO and C<sub>2</sub>H<sub>2</sub>O. These MS/MS scans are also in agreement with previously reported MS fragmentation for pinonic acid (S21). The good agreement between Figure S1a and S1b, as well as the detection of pinonic acid in the GC-MS and ESI-ToF-MS (negative ion detection) analysis of filter extracts from N<sub>2</sub>O<sub>5</sub>/α-pinene experiments (data not shown) confirms the identification of  $m/z$  185 as the parent  $[M + H]^+$  ion for pinonic acid observed in the N<sub>2</sub>O<sub>5</sub>/α-pinene experiment.

Following a similar mechanism to that reported for OH/α-pinene chemistry (S21-23), we propose that the formation of pinonic acid occurs by abstraction of the aldehydic hydrogen of pinonaldehyde, followed by reaction with HO<sub>2</sub> (Scheme S3). This HO<sub>2</sub> reaction with pinonaldehyde has also been reported to be a source of peroxy pinonic acid (S18, 22), which would give an  $[M + H]^+$  peak at  $m/z$  201. However, the  $m/z$  201 cannot be assigned unequivocally to peroxy pinonic acid formed in the reaction of NO<sub>3</sub> with pinonaldehyde. For example, Hansel and Wisthaler (S24) observed in the PTR-MS spectrum of PAN, a fragment

corresponding to a peroxy carboxylic acid, which they proposed was formed from secondary reactions of the protonated PAN:

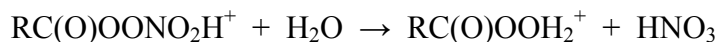

It is therefore possible that pinonaldehyde-PAN undergoes similar chemistry in the source region to give an  $[\text{M} + \text{H} + \text{H}_2\text{O} - \text{HNO}_3]^+$  fragment at  $m/z$  201.

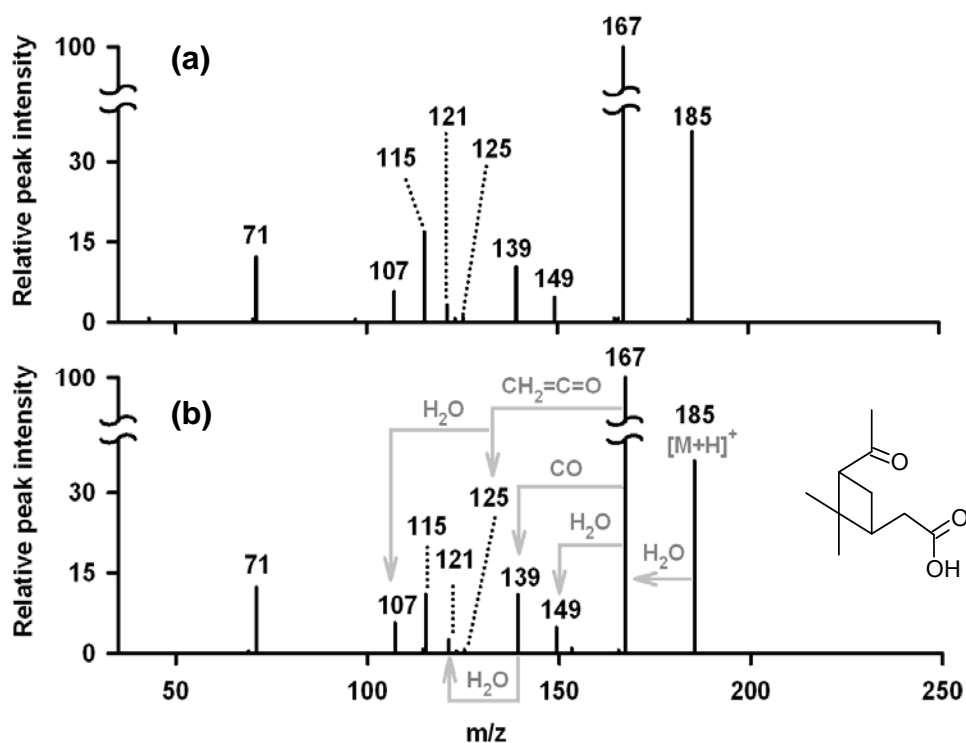

**Figure S1.** Product ion spectra of  $m/z$  185 from (a) a  $\text{N}_2\text{O}_5/\alpha$ -pinene chamber experiment (4 ppm  $\text{N}_2\text{O}_5$ , 1.4 ppm  $\alpha$ -pinene, 110 min reaction time), and (b) the headspace of *cis*-pinonic acid standard. Both spectra were taken at a collision energy (CE) of 10 eV.

The present studies were carried out with relatively high  $\text{NO}_2$  and low  $\text{NO}$  concentrations (due to the use of the thermal decomposition of  $\text{N}_2\text{O}_5$  as the  $\text{NO}_3$  source), which will favor PAN formation. Under atmospheric conditions where  $\text{NO}_3$  is formed and  $\text{NO}$  is low, the alkyl

peroxy radicals formed in the  $\alpha$ -pinene oxidation undergo cross reactions with other RO<sub>2</sub> and HO<sub>2</sub> (S20). In the latter case, the formation of hydroperoxides is expected. In air, cross-reaction of RO<sub>2</sub> from the  $\alpha$ -pinene reaction with those from other organics is more likely than self-reaction, but generation of the alkoxy radical will then lead for the most part to the same products observed in the present studies. In short, the products identified here are expected to be formed in forested regions.

**Details of Precursor and Product Ion (MS/MS) Scans.**

Table S1 summarizes the precursor and product ions of the even-numbered mass peaks observed in the Q1 scan in Figure 1 of the text.

**Table S1.** Precursor and product ions of the even-numbered peaks observed in the Q1 scan of a N<sub>2</sub>O<sub>5</sub>/α-pinene experiments (4 ppm N<sub>2</sub>O<sub>5</sub>, 1.4 ppm α-pinene).

| Observed <i>m/z</i> peak in Q <sub>1</sub> spectra | Precursor ions (PIS mode) <sup>a</sup>                      | Product ions (MS/MS mode) <sup>a</sup>                                                                                                                                                               | Parent peak identification observed in Q1 scan                                                |
|----------------------------------------------------|-------------------------------------------------------------|------------------------------------------------------------------------------------------------------------------------------------------------------------------------------------------------------|-----------------------------------------------------------------------------------------------|
| 198                                                | 198 (100%)<br>200 (1%)<br>216 (2%)<br>246 (5%) <sup>b</sup> | 198 (100%)<br>151, - HNO <sub>2</sub> (4%)                                                                                                                                                           | fragment ion of 2-hydroxypinane-3-nitrate (MW 215)                                            |
| 200                                                | 200 (33%)<br>246 (100%)                                     | 200 (100%)<br>183, - OH (17%)<br>198, - H <sub>2</sub> (0.5%)<br>167, - HO <sub>2</sub> (0.5%)<br>165, - (OH + H <sub>2</sub> O) (6%)                                                                | fragment ion of pinonaldehyde-PAN (MW 245)                                                    |
| 212                                                | 212 (100%)                                                  | 212 (100%)<br>166, - NO <sub>2</sub> (6%)<br>148, - (H <sub>2</sub> O + NO <sub>2</sub> ) (2%)                                                                                                       | fragment ion of a carbonyl hydroxynitrate product (MW 229) <sup>c</sup>                       |
| 214                                                | 214 (100%)                                                  | 214 (100%)<br>168, - NO <sub>2</sub> (20%)<br>151, - HNO <sub>3</sub> (41%)                                                                                                                          | [M + H] <sup>+</sup> ion of 3-oxopinane-2-nitrate (MW 213)                                    |
| 216                                                | 216 (100%)                                                  | 216 (100%)<br>198, - H <sub>2</sub> O (9%)<br>170, - NO <sub>2</sub> (2%)<br>152, - (H <sub>2</sub> O + NO <sub>2</sub> ) (25%)                                                                      | [M + H] <sup>+</sup> ion of 2-hydroxypinane-3-nitrate (MW 215)                                |
| 228                                                | 228 (100%)<br>246 (44%)                                     | 228 (100%)<br>182, - NO <sub>2</sub> (9%)<br>163, - (HNO <sub>2</sub> + H <sub>2</sub> O) (11%)                                                                                                      | fragment ion of pinonaldehyde-PAN (MW 245)                                                    |
| 230                                                | 230 (100%)                                                  | 230 (59%)<br>212, - H <sub>2</sub> O (1%)<br>184, - NO <sub>2</sub> (100%)<br>166, - (H <sub>2</sub> O + NO <sub>2</sub> ) (3%)                                                                      | [M + H] <sup>+</sup> ion of (3-acetyl-2,2-dimethyl-3-nitrooxycyclobutyl)acetaldehyde (MW 229) |
| 232                                                | 232 (100%)                                                  | 232 (100%)<br>214, - H <sub>2</sub> O (1%)<br>199, - HO <sub>2</sub> (1%)<br>186, - NO <sub>2</sub> (3%)<br>153, - HOONO <sub>2</sub> (20%)                                                          | [M + H] <sup>+</sup> ion of norpinonaldehyde-PAN (MW 229)                                     |
| 246                                                | 246 (100%)                                                  | 246 (100%)<br>228, - H <sub>2</sub> O (0.9%)<br>200, - NO <sub>2</sub> (92%)<br>198, - (H <sub>2</sub> + NO <sub>2</sub> ) (0.6%)<br>183, - HNO <sub>3</sub> (4%)<br>167, - HOONO <sub>2</sub> (10%) | [M + H] <sup>+</sup> ion of pinonaldehyde-PAN (MW 245)                                        |

<sup>a</sup>Relative intensities in parentheses correspond to the intensity of each peak ratioed to the base peak (100%); precursor ions and MS/MS scans were recorded at a low collision energy (CE = 5 eV).

<sup>b</sup>Note that the MS/MS of *m/z* 246 has only a very weak peak at *m/z* 198, suggesting that pinonaldehyde-PAN does not contribute significantly to *m/z* 198. The alcohol at *m/z* 216 is expected to lose water and to be a major source of this peak.

<sup>c</sup>The absence of *m/z* 230 in the precursor ion scan suggests complete fragmentation of the [M + H]<sup>+</sup> peak via loss of water.

## Identification of Products in Particles Collected on Filters Using Accurate Mass Measurement.

APCI-ToF-MS in the positive ion mode of filter extracts was used to confirm the identification of some of the peaks observed in the APCI-MS data. Figure S2 shows a typical spectrum. Peaks in common with the Q1 scan from the APCI-MS measurement using the denuder (Figure 1b in text) include  $m/z$  151, 167, 169, 185, 198, and 214.

Exact masses were obtained using caffeine (194.0804 Da) as the reference. All assignments were based on the fact that the discrepancy between the measured mass and the calculated masses for the possible elemental compositions was small for the assigned elemental composition and much larger for the next available possibilities (see Table S2). Exact mass measurements established that the peak at  $m/z$  169.1229 is due to  $C_{10}H_{17}O_2$  and that at  $m/z$  151.1123 is due to  $C_{10}H_{15}O$ , consistent with the  $[M + H]^+$  and  $[M + H - H_2O]^+$  fragments from pinonaldehyde. The exact difference of 18.0106 Da corresponds to the loss of  $H_2O$ .

Similarly, this analysis provided elemental compositions of  $C_{10}H_{17}O_3$  (exact mass  $m/z$  185.1178) and  $C_{10}H_{15}O_2$  (exact mass  $m/z$  167.1072), consistent with pinonic acid peaks at  $[M + H]^+$  and  $[M + H - H_2O]^+$ . The presence of one additional oxygen compared to pinonaldehyde (exact mass difference = 15.9949 Da) and the exact difference of 18.0106 Da for the two fragments are again consistent with pinonic acid.

The exact mass of  $m/z$  214.1079 is an elemental composition of  $C_{10}H_{16}NO_4$ , corresponding to 3-oxopinane-2-nitrate. Similarly, the exact mass of  $m/z$  198.1130,  $C_{10}H_{16}NO_3$ , corresponds to loss of water from 2-hydroxypinane-3-nitrate, which readily occurs in alcohols, and is likely enhanced by the high temperature of the source so that no parent  $[M + H]^+$  appears.

There is a large peak with exact mass at  $m/z$  168.1150, corresponding to an elemental composition of  $C_{10}H_{16}O_2$  (difference - 8.5 ppm). An alternative elemental composition,  $C_6H_{16}O_5$  does not agree well with the measured mass (difference > 82.2 ppm). The exact difference of 45.9929 Da between  $m/z$  214.1079 and  $m/z$  168.1150 suggests loss of  $NO_2$  from a protonated ion fragment at  $m/z$  214.1079, consistent with protonated 3-oxopinane-2-nitrate as the precursor ion to  $m/z$  168.1150. The presence of the  $m/z$  168 fragment in the APCI-ToF-MS scan but not in the APCI-triple quadrupole-MS measurement can be explained by decomposition of the product at the high temperature of the APCI-ToF-MS source (500 °C) since organic nitrates are well known to decompose thermally to  $RO + NO_2$  at high temperatures (> 300 °C) (S9, S25-28).

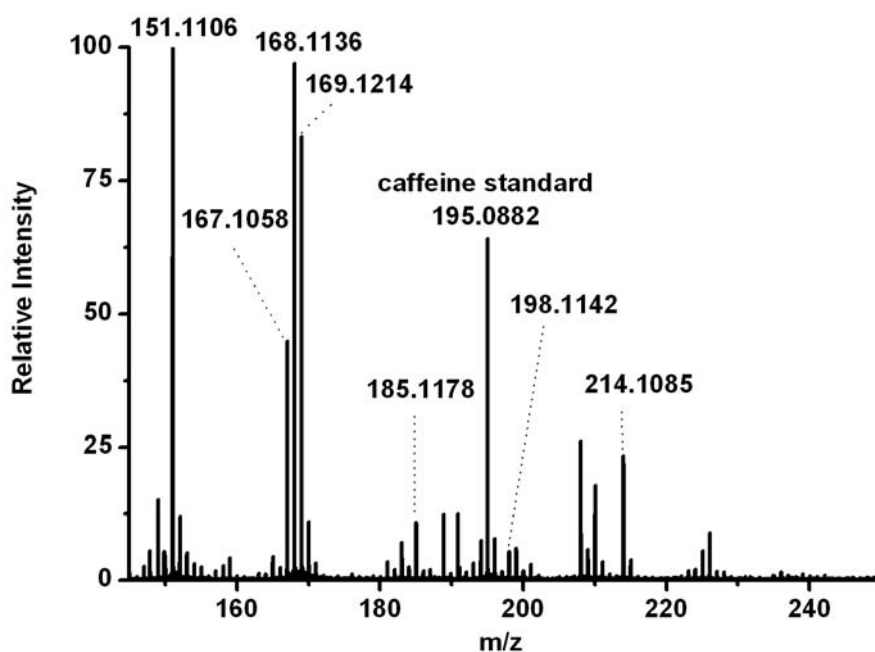

**Figure S2.** Typical APCI-ToF-MS (positive ion detection) spectrum of a filter extract from a chamber experiment using 1 ppm of  $N_2O_5$  and 2 ppm of  $\alpha$ -pinene.

**Table S2.** Exact mass measurements from APCI-ToF-MS analysis (positive ion detection) on filter extracts from a chamber experiment using 1 ppm of N<sub>2</sub>O<sub>5</sub> and 2 ppm of α-pinene.

| Observed Mass ( <i>m/z</i> ) | Calculated mass (Da) | Difference (mDa) | Difference (ppm) | Formula                                         |
|------------------------------|----------------------|------------------|------------------|-------------------------------------------------|
| <b>151.1106</b>              | 151.1123             | -1.7             | -11.2            | C <sub>10</sub> H <sub>15</sub> O               |
|                              | 151.0970             | 13.6             | 89.8             | C <sub>6</sub> H <sub>15</sub> O <sub>4</sub>   |
|                              | 151.1334             | -22.8            | -151.0           | C <sub>7</sub> H <sub>19</sub> O <sub>3</sub>   |
| <b>167.1058</b>              | 167.1072             | -1.4             | -8.4             | C <sub>10</sub> H <sub>15</sub> O <sub>2</sub>  |
|                              | 167.0919             | 13.9             | 82.9             | C <sub>6</sub> H <sub>15</sub> O <sub>5</sub>   |
|                              | 167.0861             | 19.7             | 118.0            | C <sub>13</sub> H <sub>11</sub>                 |
| <b>168.1136</b>              | 168.1150             | -1.4             | -8.5             | C <sub>10</sub> H <sub>16</sub> O <sub>2</sub>  |
|                              | 168.0998             | 13.8             | 82.2             | C <sub>6</sub> H <sub>16</sub> O <sub>5</sub>   |
|                              | 168.0939             | 19.7             | 117.2            | C <sub>13</sub> H <sub>12</sub>                 |
| <b>169.1214</b>              | 169.1229             | -1.5             | -8.6             | C <sub>10</sub> H <sub>17</sub> O <sub>2</sub>  |
|                              | 169.1076             | 13.8             | 81.6             | C <sub>6</sub> H <sub>17</sub> O <sub>5</sub>   |
|                              | 169.1017             | 19.7             | 116.3            | C <sub>13</sub> H <sub>13</sub>                 |
| <b>185.1178</b>              | 185.1178             | 0.0              | 0.2              | C <sub>10</sub> H <sub>17</sub> O <sub>3</sub>  |
|                              | 185.1330             | -5.2             | -82.2            | C <sub>14</sub> H <sub>17</sub>                 |
|                              | 185.1025             | 15.3             | 82.6             | C <sub>6</sub> H <sub>17</sub> O <sub>6</sub>   |
| <b>198.1142</b>              | 198.1130             | 1.2              | 6.0              | C <sub>10</sub> H <sub>16</sub> NO <sub>3</sub> |
|                              | 198.1283             | -14.1            | -71.0            | C <sub>14</sub> H <sub>16</sub> N               |
|                              | 198.0979             | 16.4             | 83.0             | C <sub>6</sub> H <sub>16</sub> NO <sub>6</sub>  |
| <b>214.1085</b>              | 214.1079             | 0.6              | 2.6              | C <sub>10</sub> H <sub>16</sub> NO <sub>4</sub> |
|                              | 214.1232             | -14.7            | -68.6            | C <sub>14</sub> H <sub>16</sub> NO              |
|                              | 214.0927             | 15.8             | 73.9             | C <sub>6</sub> H <sub>16</sub> NO <sub>7</sub>  |

### Gas-Particle Partitioning.

Products observed in this study have been detected in the gas phase as well as in the particles.

According to Pankow and co-workers (S29, S30), the equilibrium partitioning of component *i* between the gas-phase and the particles can be described by a partitioning coefficient  $K_{p,i}$  as:

$$K_p = \frac{F_i / TSP}{A_i} = \frac{760.R.T.f_{om}}{MW_{om} \cdot 10^6 \cdot \zeta_i \cdot \rho_{L,i}^0} \quad (S1)$$

where  $F_i$  (ng m<sup>-3</sup>) is the concentration of compound *i* in the particles, *TSP* is the total suspended particle concentration in μg m<sup>-3</sup> and  $A_i$  (ng m<sup>-3</sup>) is the gas phase concentration of compound *i* (S29, S30). The ideal gas constant, *R*, is 8.206 × 10<sup>-5</sup> m<sup>3</sup> atm mol<sup>-1</sup> K<sup>-1</sup>,  $MW_{om}$  is the average molecular weight of the given organic matter (*om*),  $f_{om}$  is the weight fraction of



the suspended particulate material that constitutes the absorbing *om* phase,  $\zeta_i$  is the activity coefficient of compound  $i$  in the particulate phase (generally assumed to be close to unity) and  $p_{L,i}^o$  is the saturation vapor pressure of compound  $i$  at temperature  $T$  (S29, S30). The value of  $K_p$  depends inversely on the saturation vapor pressure ( $p_{L,i}^o$ ) which has not been reported for many of the products reported here, particularly the organic nitrates. However, a group contribution method developed by Pankow and Ascher (S31) can be used to estimate these values:

$$\log_{10} p_{L,i}^o(T) = b_0(T) + \sum_k v_{k,i} b_k(T) \quad (\text{SII})$$

In equation (SII),  $v_{k,i}$  is the number of groups of type  $k$  (e.g. carbonyl, nitrate, carboxylic acid) assigned by Pankow and Ascher (S31),  $b_k(T)$  is the temperature-dependent contribution term by each group of type  $k$ , while  $b_0(T)$  is a  $T$ -dependent constant. Equation (SII) was used to estimate the vapor pressures that are reported in Table S3.

**Table S3.** Estimated vapor pressures ( $p_{L,i}^0$ , atm) of products from the NO<sub>3</sub> oxidation of  $\alpha$ -pinene at  $T = 306$  K

| Compounds (MW)                                                 | Calculated $p_{L,i}^0$ (atm) at 306 K <sup>a,b</sup> | Reference               |
|----------------------------------------------------------------|------------------------------------------------------|-------------------------|
| norpinonaldehyde (154)                                         | $1.1 \times 10^{-4}$                                 | this work               |
| pinonaldehyde (168)                                            | $4.2 \times 10^{-5}$                                 | this work               |
|                                                                | $5.8 \times 10^{-5}$                                 | from (S32) <sup>c</sup> |
|                                                                | $1.12 \times 10^{-4}$                                | from (S16)              |
| pinonic acid (184)                                             | $3.1 \times 10^{-7}$                                 | this work               |
|                                                                | $4.5 \times 10^{-7}$                                 | from (S32) <sup>c</sup> |
| 3-oxopinane-2-nitrate (213)                                    | $5.4 \times 10^{-6}$                                 | this work               |
| 2-hydroxypinane-3-nitrate (215)                                | $3.7 \times 10^{-7}$                                 | this work               |
| carbonyl hydroxynitrate (229)                                  | $(2.0-4.3) \times 10^{-8}$ <sup>d</sup>              | this work               |
| (3-acetyl-2,2-dimethyl-3-nitrooxycyclobutyl)acetaldehyde (229) | $3.2 \times 10^{-7}$                                 | this work               |
| norpinonaldehyde-PAN (231)                                     | $9.8 \times 10^{-6}$                                 | this work               |
| pinonaldehyde-PAN (245)                                        | $3.9 \times 10^{-6}$                                 | this work               |

<sup>a</sup>Based on approach of Pankow and Ascher (S31); see text.

<sup>b</sup>Vapor pressure were calculated at  $T = 306$  K in order to compare with published data from reference (S32).

<sup>c</sup>Estimated vapor pressure using a modified Clausius-Clapeyron equation from reference (S32)

<sup>d</sup>The range of vapor pressures represents aldehyde or a ketone functionalities in the molecule, along with an hydroxy and an organic nitrate group (see Scheme S2 in SI).

#### Literature Cited

- (S1) Ezell, M. J.; Johnson, S. N.; Yu, Y.; Perraud, V.; Bruns, E. A.; Alexander, M. L.; Zelenyuk, A.; Dabdub, D.; Finlayson-Pitts, B. J., A new aerosol flow system for photochemical and thermal studies of tropospheric aerosols. *Aerosol Sci. Technol.* **2010**, *44*, 329-338.
- (S2) Yu, J. Z.; Flagan, R. C.; Seinfeld, J. H., Identification of products containing -COOH, -OH, and -C=O in atmospheric oxidation of hydrocarbons. *Environ. Sci. Technol.* **1998**, *32*, 2357-2370.
- (S3) Berndt, T.; Boge, O., Products and mechanism of the gas-phase reaction of NO<sub>3</sub> radicals with  $\alpha$ -pinene. *J. Chem. Soc., Faraday Trans.* **1997**, *93*, 3021-3027.
- (S4) Hallquist, M.; Wangberg, I.; Ljungstrom, E.; Barnes, I.; Becker, K. H., Aerosol and product yields from NO<sub>3</sub> radical-initiated oxidation of selected monoterpenes. *Environ. Sci. Technol.* **1999**, *33*, 553-559.
- (S5) Jay, K.; Stieglitz, L., The gas-phase addition of NO<sub>x</sub> to olefins. *Chemosphere* **1989**, *19*, 1939-1950.
- (S6) Spittler, M.; Barnes, I.; Bejan, I.; Brockmann, K. J.; Benter, T.; Wirtz, K., Reactions of NO<sub>3</sub> radicals with limonene and  $\alpha$ -pinene: Product and SOA formation. *Atmos. Environ.* **2006**, *40*, S116-S127.
- (S7) Wangberg, I.; Barnes, I.; Becker, K. H., Product and mechanistic study of the reaction of NO<sub>3</sub> radicals with  $\alpha$ -pinene. *Environ. Sci. Technol.* **1997**, *31*, 2130-2135.

- (S8) Calogirou, A.; Larsen, B. R.; Kotzias, D., Gas-phase terpene oxidation products: A review. *Atmos. Environ.* **1999**, *33*, 1423-1439.
- (S9) Noziere, B.; Barnes, I., Evidence for formation of a PAN analogue of pinonic structure and investigation of its thermal stability. *J. Geophys. Res.* **1998**, *103*, 25587-25597.
- (S10) Orlando, J. J.; Noziere, B.; Tyndall, G. S.; Orzechowska, G. E.; Paulson, S. E.; Rudich, Y., Product studies of the OH- and ozone-initiated oxidation of some monoterpenes. *J. Geophys. Res.* **2000**, *105*, 11561-11572.
- (S11) Aschmann, S. M.; Reissell, A.; Atkinson, R.; Arey, J., Products of the gas phase reactions of the OH radical with  $\alpha$ - and  $\beta$ -pinene in the presence of NO. *J. Geophys. Res.* **1998**, *103*, 25553-25561.
- (S12) Davis, M. E.; Stevens, P. S., Measurements of the kinetics of the OH-initiated oxidation of  $\alpha$ -pinene: Radical propagation in the OH plus  $\alpha$ -pinene + O<sub>2</sub> + NO reaction system. *Atmos. Environ.* **2005**, *39*, 1765-1774.
- (S13) Dibble, T. S., Reactions of the alkoxy radicals formed following OH-addition to  $\alpha$ -pinene and  $\beta$ -pinene. C-C bond scission reactions. *J. Am. Chem. Soc.* **2001**, *123*, 4228-4234.
- (S14) Glasius, M.; Calogirou, A.; Jensen, N. R.; Hjorth, J.; Nielsen, C. J., Kinetic study of gas-phase reactions of pinonaldehyde and structurally related compounds. *Int. J. Chem. Kinet.* **1997**, *29*, 527-533.
- (S15) Alvarado, A.; Arey, J.; Atkinson, R., Kinetics of the gas-phase reactions of OH and NO<sub>3</sub> radicals and O<sub>3</sub> with the monoterpene reaction products pinonaldehyde, caronaldehyde, and sabinaketone. *J. Atmos. Chem.* **1998**, *31*, 281-297.
- (S16) Hallquist, M.; Wangberg, I.; Ljungstrom, E., Atmospheric fate of carbonyl oxidation products originating from  $\alpha$ -pinene and  $\Delta$ -(3)-carene: Determination of rate of reaction with OH and NO<sub>3</sub> radicals, UV absorption cross sections, and vapor pressures. *Environ. Sci. Technol.* **1997**, *31*, 3166-3172.
- (S17) Atkinson, R.; Baulch, D. L.; Cox, R. A.; Crowley, J. N.; Hampson, R. F.; Hynes, R. G.; Jenkin, M. E.; Rossi, M. J.; Troe, J., Evaluated kinetic and photochemical data for atmospheric chemistry: Volume II - Gas phase reactions of organic species. *Atmos. Chem. Phys.* **2006**, *6*, 3625-4055.
- (S18) Jaoui, M.; Kamens, R. M., Gas phase photolysis of pinonaldehyde in the presence of sunlight. *Atmos. Environ.* **2003**, *37*, 1835-1851.
- (S19) Noziere, B.; Barnes, I.; Becker, K. H., Product study and mechanisms of the reactions of  $\alpha$ -pinene and of pinonaldehyde with OH radicals. *J. Geophys. Res.* **1999**, *104*, 23645-23656.
- (S20) Finlayson-Pitts, B. J.; Pitts, J. N., Jr. *Chemistry of the Upper and Lower Atmosphere - Theory, Experiments, and Applications*. Academic Press: San Diego, 2000.
- (S21) Larsen, B. R.; Di Bella, D.; Glasius, M.; Winterhalter, R.; Jensen, N. R.; Hjorth, J., Gas-phase OH oxidation of monoterpenes: Gaseous and particulate products. *J. Atmos. Chem.* **2001**, *38*, 231-276.
- (S22) Kamens, R. M.; Jaoui, M., Modeling aerosol formation from  $\alpha$ -pinene plus NO<sub>x</sub> in the presence of natural sunlight using gas-phase kinetics and gas-particle partitioning theory. *Environ. Sci. Technol.* **2001**, *35*, 1394-1405.
- (S23) Librando, V.; Tringali, G., Atmospheric fate of OH initiated oxidation of terpenes. Reaction mechanism of alpha-pinene degradation and secondary organic aerosol formation. *J. Environ. Manag.* **2005**, *75*, 275-282.
- (S24) Hansel, A.; Wisthaler, A., A method for real-time detection of PAN, PPN and MPAN in ambient air. *Geophys. Res. Lett.* **2000**, *27*, 895-898.

- (S25) Gaffney, J. S.; Marley, N. A.; Prestbo, E. W., Peroxyacyl nitrates (PANs): Their physical and chemical properties. In *The Handbook of Environmental Chemistry*, Hutzinger, O., Ed. Springer-Verlag: Berlin, 1989; Vol. 4, pp 1-38.
- (S26) Kleindienst, T. E., Recent development in the chemistry and biology of peroxyacetyl nitrate. *Res. Chem. Intermed.* **1994**, *20*, 335-384.
- (S27) Roberts, J. M., The atmospheric chemistry of organic nitrates. *Atmos. Environ. Part A-General Topics* **1990**, *24*, 243-287.
- (S28) Roberts, J. M., PAN and related compounds. In *Volatile Organic Compounds in the Atmosphere*, Koppmann, R., Ed. Blackwell Publishing: 2007; pp 221-268.
- (S29) Pankow, J. F., An absorption-model of gas-particle partitioning of organic-compounds in the atmosphere. *Atmos. Environ.* **1994**, *28*, 185-188.
- (S30) Pankow, J. F., An absorption-model of the gas aerosol partitioning involved in the formation of secondary organic aerosol. *Atmos. Environ.* **1994**, *28*, 189-193.
- (S31) Pankow, J. F.; Asher, W. E., SIMPOL.1: A simple group contribution method for predicting vapor pressures and enthalpies of vaporization of multifunctional organic compounds. *Atmos. Chem. Phys.* **2008**, *8*, 2773-2796.
- (S32) Yu, J. Z.; Cocker, D. R.; Griffin, R. J.; Flagan, R. C.; Seinfeld, J. H., Gas-phase ozone oxidation of monoterpenes: Gaseous and particulate products. *J. Atmos. Chem.* **1999**, *34*, 207-258.
